# Supplementary material for: Diagnostic accuracy of an in-house Scrub Typhus enzyme linked immunoassay for the detection of IgM and IgG antibodies in Laos
Source: PubMed Central journal article supplement (PMC7746293; doi:10.1371/journal.pntd.0008858), 2020-12-07
Supplement: pntd.0008858.s003.pdf [file pntd.0008858.s003.pdf]

**Supplementary Table 1.** Number of IFA titers for admission and follow-up IgM and IgG samples with an ELISA Optical Density (OD) $<0.5$ .

| IFA titer     | Adm IgM | FU IgM | Adm IgG | FU IgG |
|---------------|---------|--------|---------|--------|
| <1:100        | 140     | 86     | 98      | 82     |
| 1:100         | 2       | 2      | 5       | 3      |
| 1:200         | 1       | 0      | 3       | 1      |
| 1:400         | 0       | 0      | 1       | 0      |
| 1:800         | 0       | 0      | 3       | 0      |
| $\geq 1:1600$ | 0       | 0      | 0       | 0      |
| Total*        | 143     | 88     | 110     | 86     |

\* The IFA titer was determined for both the admission and follow-up sample for an antibody isotype if either the admission or follow-up ELISA OD $\geq 0.50$  for that antibody isotype. For one participant with an IgM ELISA OD $<0.50$  for both admission and follow-up sample, the IFA titers for IgM had been determined for unknown reasons but was included in the analysis. To retrospectively validate the ELISA OD cut-off of 0.50, a further 50 samples with ELISA OD results of  $<0.50$  for both admission and follow-up IgM and IgG were retested for both IgM and IgG IFA titers. Adm=admission; FU=follow-up.
