# Supplementary material for: Diagnostic accuracy of an in-house Scrub Typhus enzyme linked immunoassay for the detection of IgM and IgG antibodies in Laos
Source: PubMed Central journal article supplement (PMC7746293; doi:10.1371/journal.pntd.0008858), 2020-12-07
Supplement: pntd.0008858.s004.pdf [file pntd.0008858.s004.pdf]

**Supplementary Table 2.** Number of IFA titers for admission and follow-up IgM and IgG samples with ELISA Optical Density (OD) $\geq$ 0.5

| IFA titer | Adm IgM | FU IgM | Adm IgG | FU IgG |
|-----------|---------|--------|---------|--------|
| <1:100    | 79      | 69     | 111     | 85     |
| 1:100     | 26      | 32     | 66      | 51     |
| 1:200     | 16      | 25     | 95      | 75     |
| 1:400     | 10      | 13     | 66      | 54     |
| 1:800     | 10      | 10     | 46      | 37     |
| 1:1600    | 9       | 8      | 30      | 33     |
| 1:3200    | 8       | 13     | 17      | 16     |
| 1:6400    | 4       | 12     | 3       | 11     |
| 1:12800   | 4       | 5      | 0       | 5      |
| 1:25600   | 1       | 1      | 1       | 1      |
|           | 167     | 188    | 435     | 368    |

Adm=admission; FU=follow-up.
