# Supplementary material for: Diagnostic accuracy of an in-house Scrub Typhus enzyme linked immunoassay for the detection of IgM and IgG antibodies in Laos
Source: PubMed Central journal article supplement (PMC7746293; doi:10.1371/journal.pntd.0008858), 2020-12-07
Supplement: pntd.0008858.s005.pdf [file pntd.0008858.s005.pdf]

**Supplementary Table 3.** Participant characteristics and ELISA with IFA results for participants with a positive PCR test for scrub typhus.

| Gender | Age (years) | Days of illness | Days between samples | Admission |          | Follow-up |          | Admission |         | Follow-up |         |
|--------|-------------|-----------------|----------------------|-----------|----------|-----------|----------|-----------|---------|-----------|---------|
|        |             |                 |                      | IgM ELISA | IgM IFA  | IgM ELISA | IgM IFA  | IgG ELISA | IgG IFA | IgG ELISA | IgG IFA |
| Male   | 15          | 14              | -                    | 0.3453    |          |           |          | 1.5233    | 1:400   |           |         |
| Female | 6           | 7               | 15                   | 0.3561    | <1:100   | 1.3800    | 1:3200   | 0.0163    |         | 0.4568    |         |
| Female | 28          | 7               | -                    | 0.3263    |          |           |          | 0.0537    |         |           |         |
| Female | 24          | 5               | 14                   | 0.1567    | <1:100   | 0.8209    | 1:3200   | 0.5630    | <1:100  | 1.9878    | 1:1600  |
| Female | 15          | 5               | 13                   | 0.6495    | 1:100    | 1.4124    | 1:800    | 0.0442    |         | 0.3597    |         |
| Female | 23          | 3               | 11                   | 0.8341    | 1:100    | 1.8167    | 1:3200   | 0.1671    | <1:100  | 0.9227    | 1:800   |
| Male   | 20          | 5               | -                    | 0.1209    |          |           |          | 0.9244    | 1:100   |           |         |
| Male   | 36          | 6               | 20                   | 0.1031    |          | 0.1886    |          | 1.6316    | 1:400   | 1.6039    | 1:1600  |
| Female | 21          | 2               | 34                   | 0.3842    | <1:100   | 1.6388    | 1:6400   | 0.0396    | <1:100  | 0.6114    | 1:3200  |
| Male   | 39          | 7               | 33                   | 0.2249    |          | 0.2302    |          | 2.6624    | 1:800   | 3.9012    | 1:12800 |
| Female | 23          | 3               | 14                   | 0.2667    |          | 0.3316    |          | 1.0355    | <1:100  | 3.1153    | 1:800   |
| Male   | 15          | 8               | 6                    | 0.3591    |          | 0.3143    |          | 2.0702    | 1:400   | 3.7655    | 1:6400  |
| Male   | 4           | 3               | 34                   | 0.2259    | <1:100   | 1.1886    | 1:800    | 0.0198    | <1:100  | 1.0788    | 1:400   |
| Female | 7           | 4               | 24                   | 1.3137    | 1:1600   | 1.3700    | ≥1:25600 | 0.1958    | <1:100  | 0.9882    | 1:200   |
| Male   | 7           | 14              | 11                   | 2.1602    | 1:3200   | 2.2157    | 1:6400   | 0.4460    | <1:100  | 0.6859    | <1:100  |
| Male   | 28          | 10              | -                    | 1.6257    | ≥1:25600 |           |          | 0.2856    |         |           |         |
| Male   | 47          | 14              | 3                    | 0.5662    | <1:100   | 0.5548    | <1:100   | 2.2096    | 1:6400  | 1.6814    | 1:6400  |
| Male   | 30          | 7               | -                    | 0.9457    | 1:6400   |           |          | 0.5200    | 1:200   |           |         |
| Female | 30          | 16              | 17                   | 1.3039    | 1:3200   | 1.4751    | 1:3200   | 0.6423    | 1:100   | 1.0462    | 1:200   |
| Female | 3           | 9               | 12                   | 1.0240    | 1:100    | 1.3653    | 1:400    | 0.0676    |         | 0.2447    |         |

Red colour indicates an ELISA OD ≥ 0.5 or IFA IgM ≥ 1:3,200 at admission or IgM ≥ 1:3,200 at follow-up with four-fold rise compared to admission; IgG ≥ 1:1,600 at admission or IgG ≥ 1:1,600 at follow-up with four-fold rise compared to admission.
